# Supplementary material for: Complexities due to single-stranded RNA during antibody detection of genomic rna:dna hybrids
Source: PubMed Central journal article supplement (PMC4393563; doi:10.1186/s13104-015-1092-1), 2015-04-08
Supplement: 13104_2015_1092_MOESM1_ESM.pdf [file 13104_2015_1092_MOESM1_ESM.pdf]

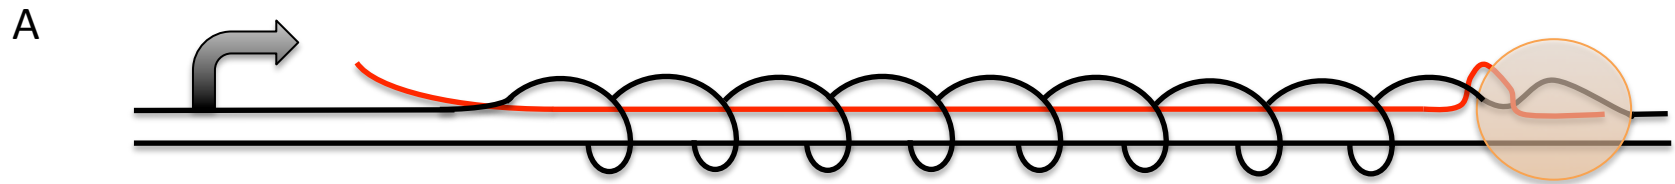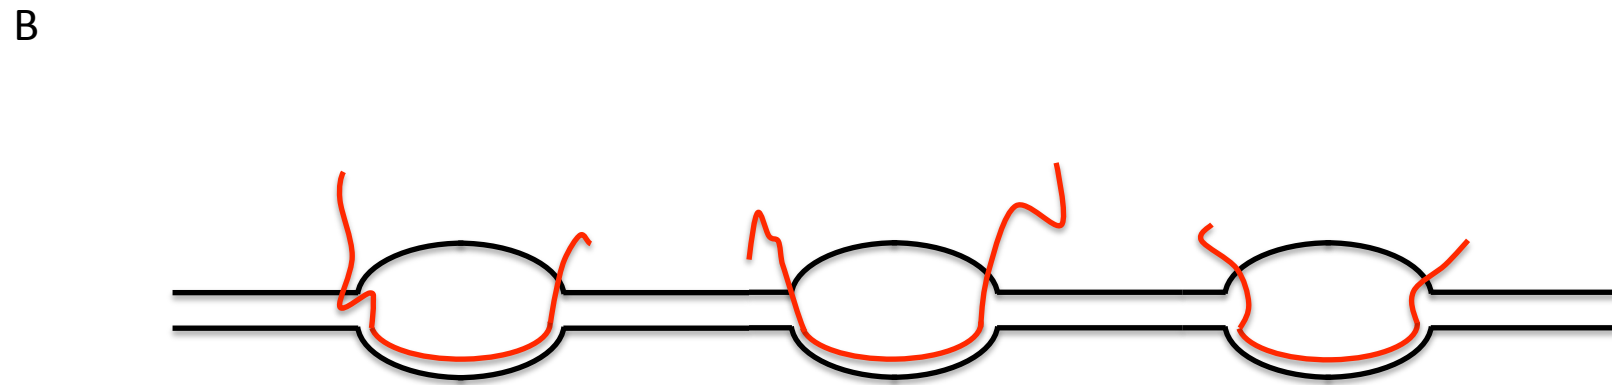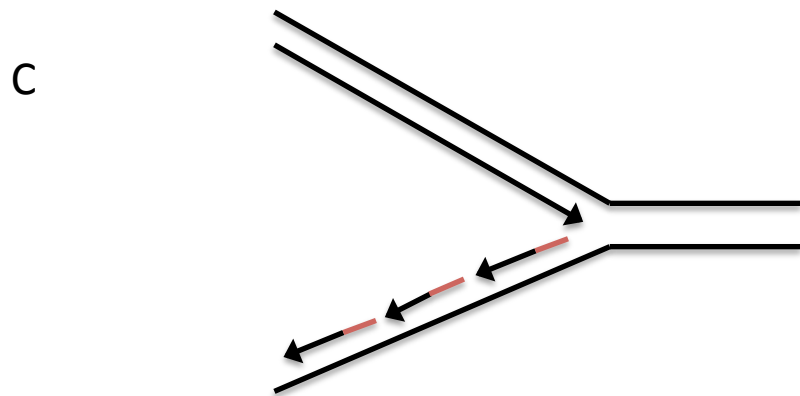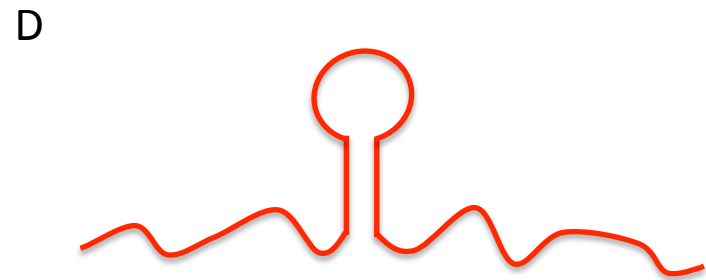

Suppl. Figure 1

### Supplementary Table 1. Real-Time PCR Oligonucleotides.

|                           | Sequence                                          | Function                                                    |
|---------------------------|---------------------------------------------------|-------------------------------------------------------------|
| <b>S9.6 ChIP</b>          |                                                   |                                                             |
| ZZ304                     | [6-FAM]CCCAGTGATAATCGGCTGCCTGATTC[BHQ1a-6FAM]     | probe for the Sa region                                     |
| ZZ305                     | CCCACGAGCTCTGTCAAGTG                              | forward primer for the Sa region                            |
| ZZ306                     | GCCGGAAGGGAAGTAATCG                               | reverse primer for the Sa region                            |
| ZZ391                     | [6-FAM]CTGGCCACCTGGGCTCATCCC[BHQ1a-6FAM]          | probe for the upstream fragment of the Sa region            |
| ZZ389                     | CTCACCGATTTGACCTACCAGAT                           | forward primer for the upstream fragment of the Sa region   |
| ZZ390                     | AGTGGTCCTGATGCCCATAGA                             | reverse primer for the upstream fragment of the Sa region   |
| ZZ394                     | [6-FAM]CACAATTGCCAAAATCACAGGTGAGCC[BHQ1a-6FAM]    | probe for the downstream fragment of the Sa region          |
| ZZ392                     | CATCCTGAGTCTGACACCTTAACTG                         | forward primer for the downstream fragment of the Sa region |
| ZZ393                     | ACAATGTCCCGGGTATGCAT                              | reverse primer for the downstream fragment of the Sa region |
| RLB96                     | [6-FAM]AACTCTCCAGCCACAGTAATGACCCAGACA[BHQ1a-6FAM] | probe for the $\mu$ region                                  |
| RLB 107                   | GCCACAGCTGTACAGAATTGAGA                           | forward primer for the $\mu$ region                         |
| RLB95                     | CAACCTTGTTCCCTAATTTTGCT                           | reverse primer for the $\mu$ region                         |
| <b>GLT Quantification</b> |                                                   |                                                             |
| ZZ274                     | CCTATGAAGGACTCAACAACATTG                          | forward for the $\alpha$ region                             |
| ZZ275                     | CCGATTATCACTGGGTCACCTTG                           | reverse primer for the $\alpha$ region                      |
| ZZ276                     | [6-FAM]ATCTACCCACTGACACTCCACGAGCTC[BHQ1a-6FAM]    | probe for the $\alpha$ region                               |
| ZZ277                     | TGCTCCCCGGGCTGTATT                                | forward primer for $\beta$ -actin region                    |
| ZZ278                     | ACATAGGAGTCCTTCTGACCCATT                          | reverse primer for $\beta$ -actin region                    |
| ZZ279                     | [6-FAM]ATCGTGGGCCGCCCTAGGCAC[BHQ1a-6FAM]          | probe for the $\beta$ -actin region                         |
